# Supplementary material for: A comprehensive study of substituent effects on poly(dibenzofulvene)s
Source: Royal Society of Chemistry journal article supplement (doi:10.1039/c6nj02861f), 2016-12-01
Supplement: c6nj02861f1.pdf [file c6nj02861f1.pdf]

Electronic Supplementary Material (ESI) for *New Journal of Chemistry*

**A Comprehensive Study of Substituent Effects on**

**Poly(dibenzofulvene)s**

Michael Y. Wong\*<sup>a</sup> and Louis M. Leung<sup>a</sup>

<sup>a</sup>*Department of Chemistry, Hong Kong Baptist University, Kowloon Tong, Hong Kong SAR, China. E-mail: myw1011@gmail.com*

Content

|                                                                                                                                                  |    |
|--------------------------------------------------------------------------------------------------------------------------------------------------|----|
| Figure S1. <sup>1</sup> H NMR spectrum of 2- <i>N,N</i> -dimethylaminodibenzofulvene in CDCl <sub>3</sub>                                        | S2 |
| Figure S2. <sup>13</sup> C NMR spectrum of 2- <i>N,N</i> -dimethylaminodibenzofulvene in CDCl <sub>3</sub>                                       | S3 |
| Figure S3. HRMS (MALDI-TOF) spectrum of 2- <i>N,N</i> -dimethylaminodibenzofulvene                                                               | S3 |
| Figure S4. <sup>1</sup> H NMR spectrum of 2-fluorodibenzofulvene in CDCl <sub>3</sub>                                                            | S4 |
| Figure S5. <sup>13</sup> C NMR spectrum of 2-fluorodibenzofulvene in CDCl <sub>3</sub>                                                           | S4 |
| Figure S6. <sup>1</sup> H NMR spectrum of <b>poly(FDBF)</b> in CDCl <sub>3</sub>                                                                 | S5 |
| Figure S7. <sup>1</sup> H NMR spectrum of <b>poly(MeODBF)</b> in CDCl <sub>3</sub>                                                               | S5 |
| Figure S8. <sup>1</sup> H NMR spectrum of <b>poly(NMe2DBF)</b> in CDCl <sub>3</sub>                                                              | S6 |
| Figure S9. GPC traces of some substituted <b>poly(DBF)s</b>                                                                                      | S6 |
| Figure S10. Comparison of IR spectra between <b>poly(CNDBF)</b> (both soluble and insoluble fractions) and 2-cyanofluorene with peak assignments | S7 |
| Figure S11. Comparison of IR spectra between <b>poly(NO2HexODBF)</b> and 2-hexoxy-7-nitrofluorene with peak assignments                          | S7 |
| Figure S12. Normalized absorption spectra of some substituted <b>poly(DBF)s</b> in THF                                                           | S8 |
| Figure S13. Normalized emission spectra of some substituted <b>poly(DBF)s</b> in THF                                                             | S8 |
| Figure S14. Normalized absorption spectra of <b>poly(BrHexODBF)</b> and 2-bromo-7-hexoxyfluorene in THF                                          | S9 |

Figure S15. Normalized emission spectra of **poly(BrHexODBF)** and 2-bromo-7-hexoxyfluorene in THF S9

Figure S16. Normalized emission spectra of **poly(CNDBF)** and 2-cyanofluorene in THF S10

Figure S17. Cyclic voltammograms of some substituted **poly(DBF)**s in THF with 0.1 M *n*-Bu<sub>4</sub>NPF<sub>6</sub> as the supporting electrolyte S11

Figure S18. Cyclic voltammograms of **poly(NMe<sub>2</sub>DBF)**s in THF with 0.1 M *n*-Bu<sub>4</sub>NPF<sub>6</sub> as the supporting electrolyte S11

Figure S19. GPC traces of poly(DBF) after annealing (top, in blue) and before annealing (bottom, in red) S12

Table S1. Electrochemical data of the substituted **poly(DBF)**s. S12

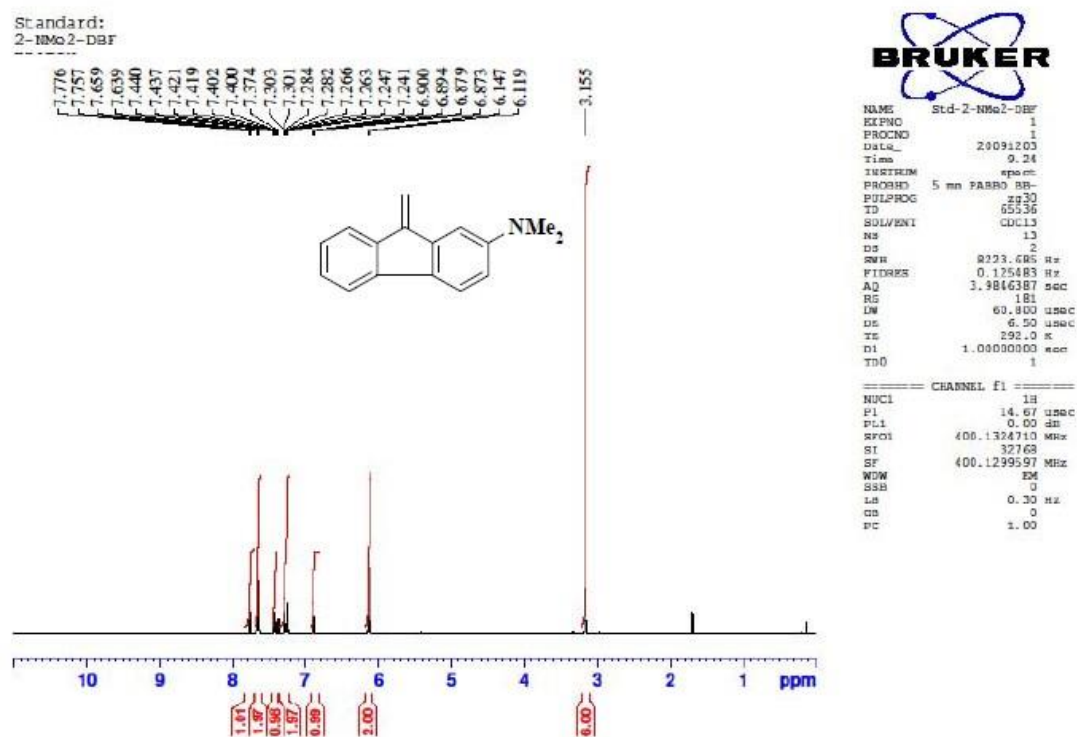

Figure S1. <sup>1</sup>H NMR spectrum of 2-*N,N*-dimethylaminodibenzofulvene in CDCl<sub>3</sub>.

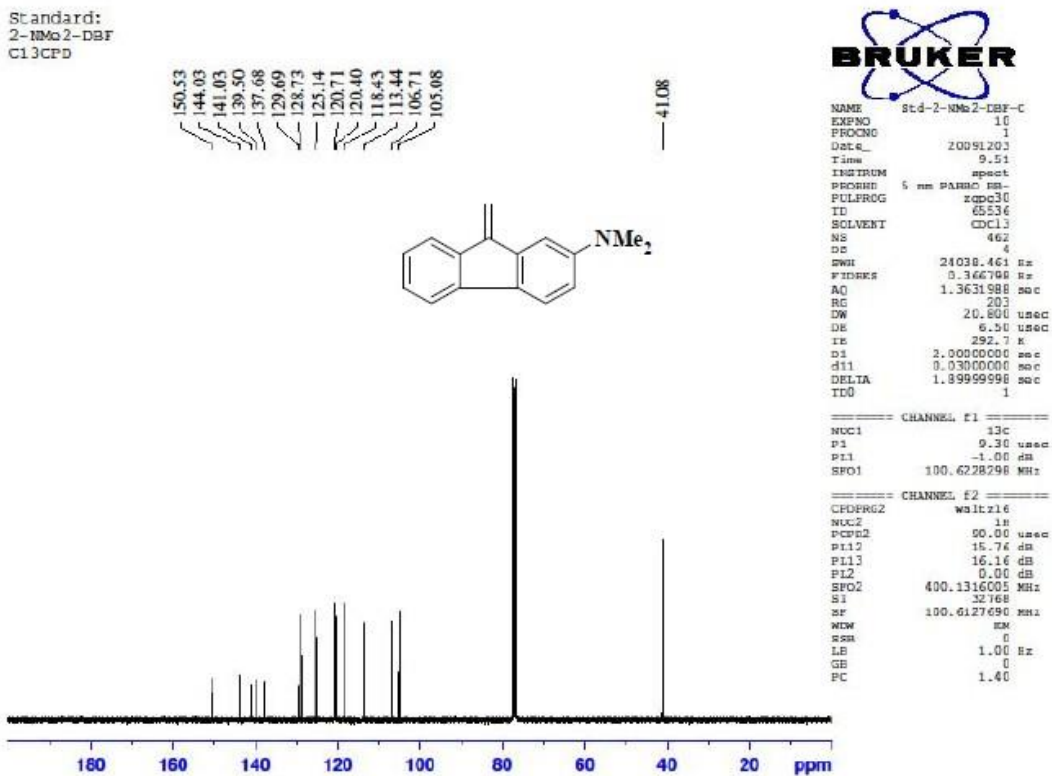

Figure S2. <sup>13</sup>C NMR spectrum of 2-*N,N*-dimethylaminodibenzofulvene in CDCl<sub>3</sub>.

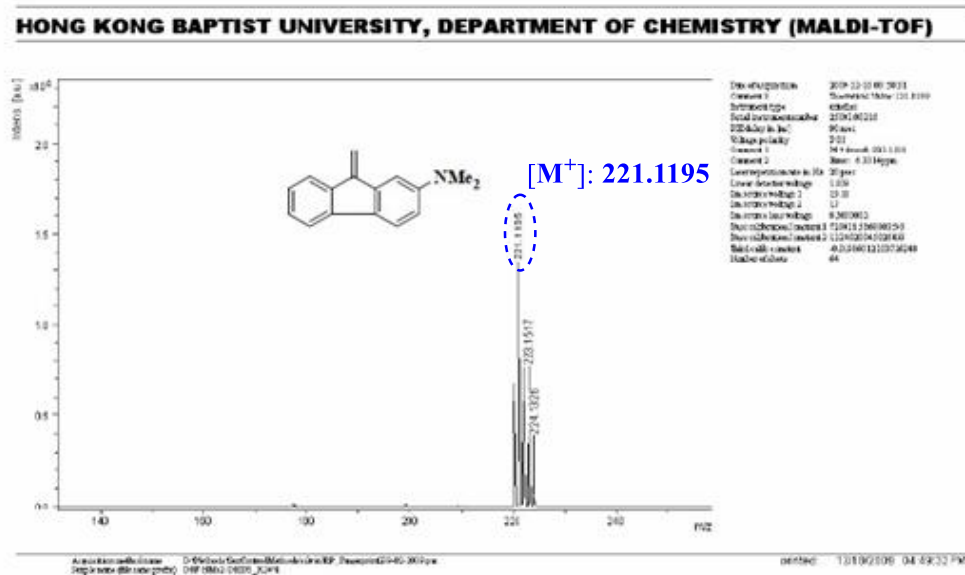

Figure S3. HRMS (MALDI-TOF) spectrum of 2-*N,N*-dimethylaminodibenzofulvene.

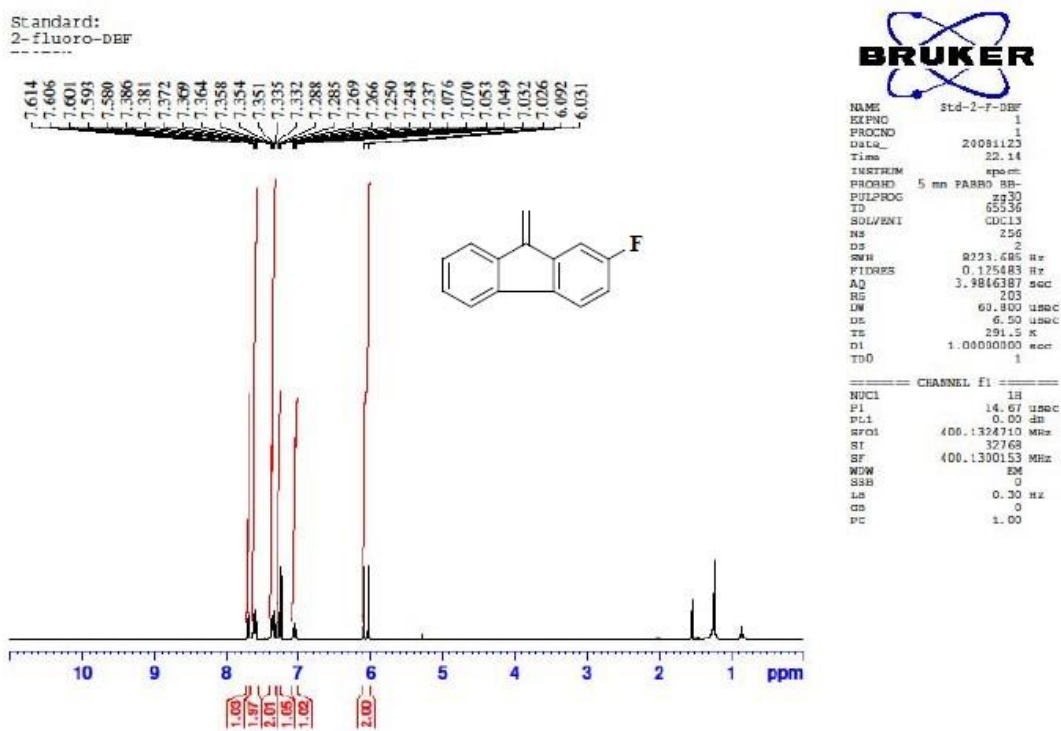

Figure S4.  $^1\text{H}$  NMR spectrum of 2-fluorodibenzofulvene in  $\text{CDCl}_3$ .

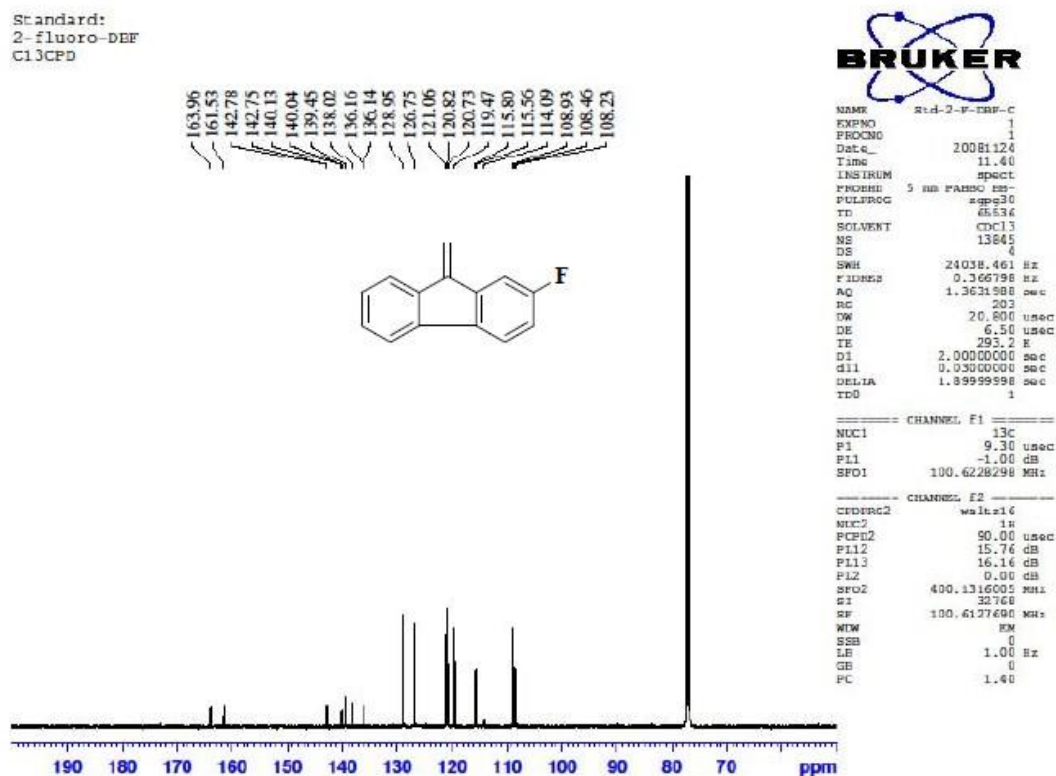

Figure S5.  $^{13}\text{C}$  NMR spectrum of 2-fluorodibenzofulvene in  $\text{CDCl}_3$ .

Standard:  
Poly(2-F-DBF)

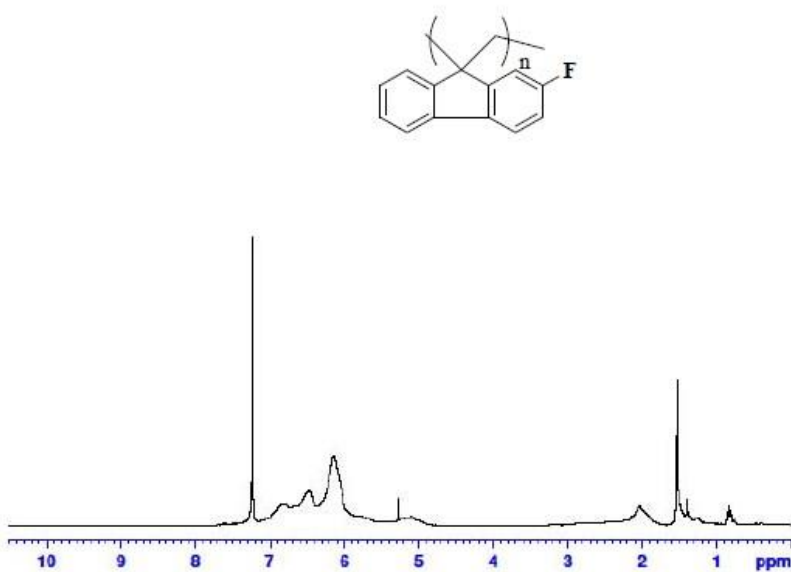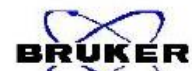

```
NAME      Std-Poly(2-F-DBF)
EXPNO     1
PROCNO    1
Date_     20090502
Time      12.01
INSTRUM   spect
PROBHD    5 mm PABBO BB-
PULPROG   zg30
TD        65536
SOLVENTI  cdcl3
NS        7983
DS        2
SWH        8223.685 Hz
FIDRES    0.125483 Hz
AQ        3.9846387 sec
RG        203
DW        60.800 usec
DE        6.50 usec
TE        291.0 K
D1        1.00000000 sec
TD0       1

===== CHANNEL f1 =====
NUC1      1H
P1        14.67 usec
PL1       0.00 dB
SFO1     400.1324710 MHz
SI        32768
SF        400.1300150 MHz
WDW       EM
SSB       0
LB        0.30 Hz
GB        0
PC        1.00
```

Figure S6.  $^1\text{H}$  NMR spectrum of **poly(FDBF)** in  $\text{CDCl}_3$ .

Standard:  
Poly(2-MeO-DBF)

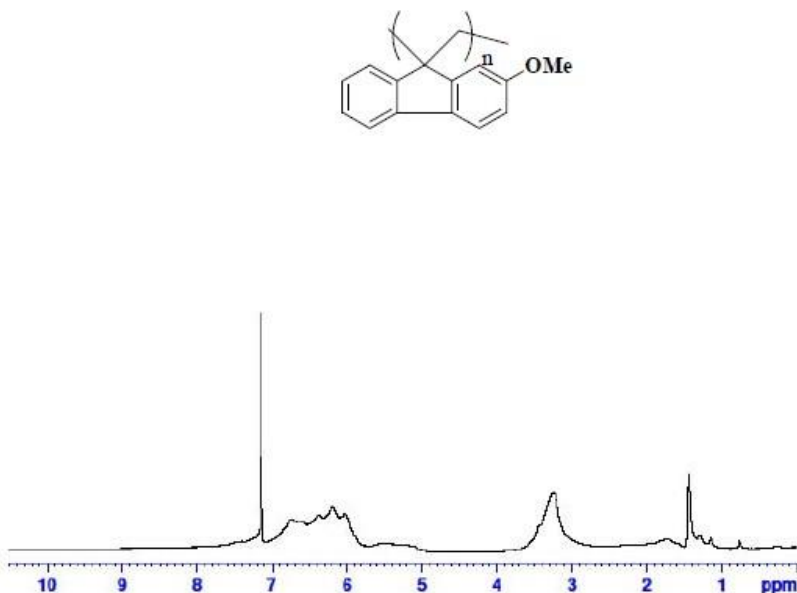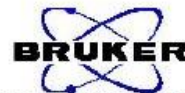

```
NAME      Std-Poly(2-MeO-DBF)
EXPNO     1
PROCNO    1
Date_     20090214
Time      22.03
INSTRUM   spect
PROBHD    5 mm PABBO BB-
PULPROG   zg30
TD        65536
SOLVENTI  CDCl3
NS        408
DS        2
SWH        8223.685 Hz
FIDRES    0.125483 Hz
AQ        3.9846387 sec
RG        203
DW        60.800 usec
DE        6.50 usec
TE        295.3 K
D1        1.00000000 sec
TD0       1

===== CHANNEL f1 =====
NUC1      1H
P1        14.67 usec
PL1       0.00 dB
SFO1     400.1324710 MHz
SI        32768
SF        400.1300557 MHz
WDW       EM
SSB       0
LB        0.30 Hz
GB        0
PC        1.00
```

Figure S7.  $^1\text{H}$  NMR spectrum of **poly(MeODBF)** in  $\text{CDCl}_3$ .

Standard:  
Poly(2-NMe2-DBF)

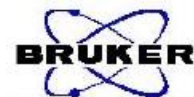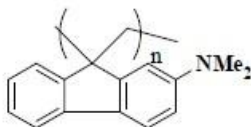

```
NAME Std-Poly(2-NMe2-DBF)
EXPNO 10
PROCNO 1
Date_ 20090414
Time 0.55
INSTRUM spect
PROBHD 5 mm PABBO BB-
PULPROG zg30
ID 65536
SOLVENT cdcl3
NS 8354
DS 2
SWH 9223.695 Hz
FIDRES 0.125483 Hz
AQ 3.984637 sec
RG 144
DW 60.800 usec
DE 6.50 usec
TE 292.3 K
D1 1.0000000 sec
TD0 1

===== CHANNEL F1 =====
NUC1 1H
P1 14.67 usec
PL1 0.00 dB
SFO1 400.1324710 MHz
SI 32768
SF 400.1300000 MHz
WDW EM
SSB 0
LB 0.30 Hz
GB 0
PC 1.00
```

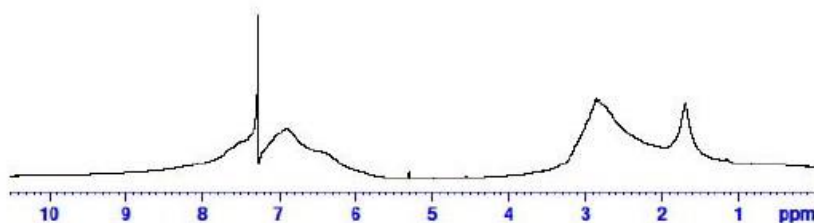

Figure S8. <sup>1</sup>H NMR spectrum of **poly(NMe<sub>2</sub>DBF)** in CDCl<sub>3</sub>.

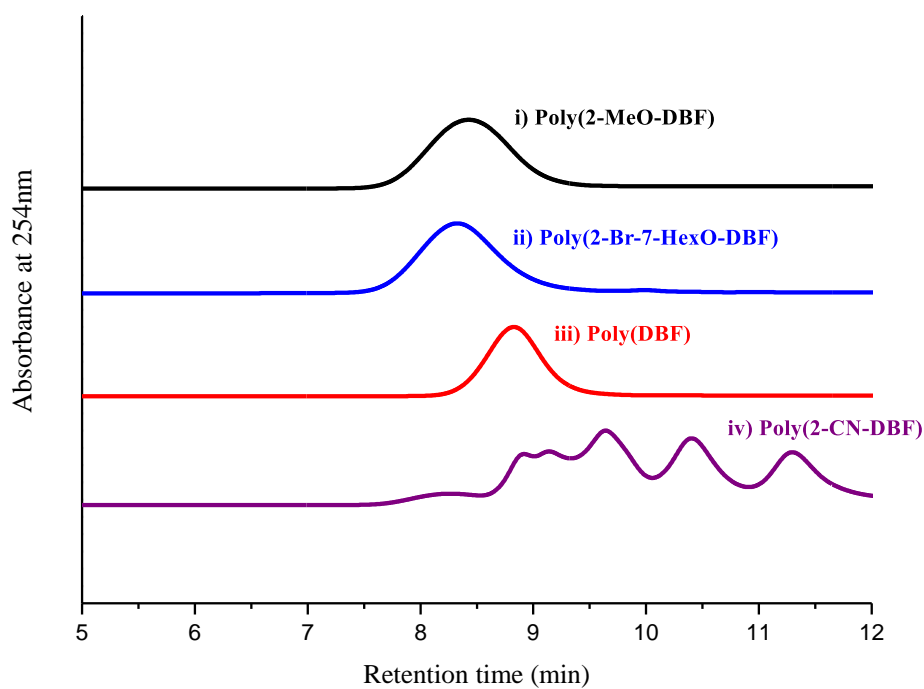

Figure S9. GPC traces of some substituted **poly(DBF)s**.

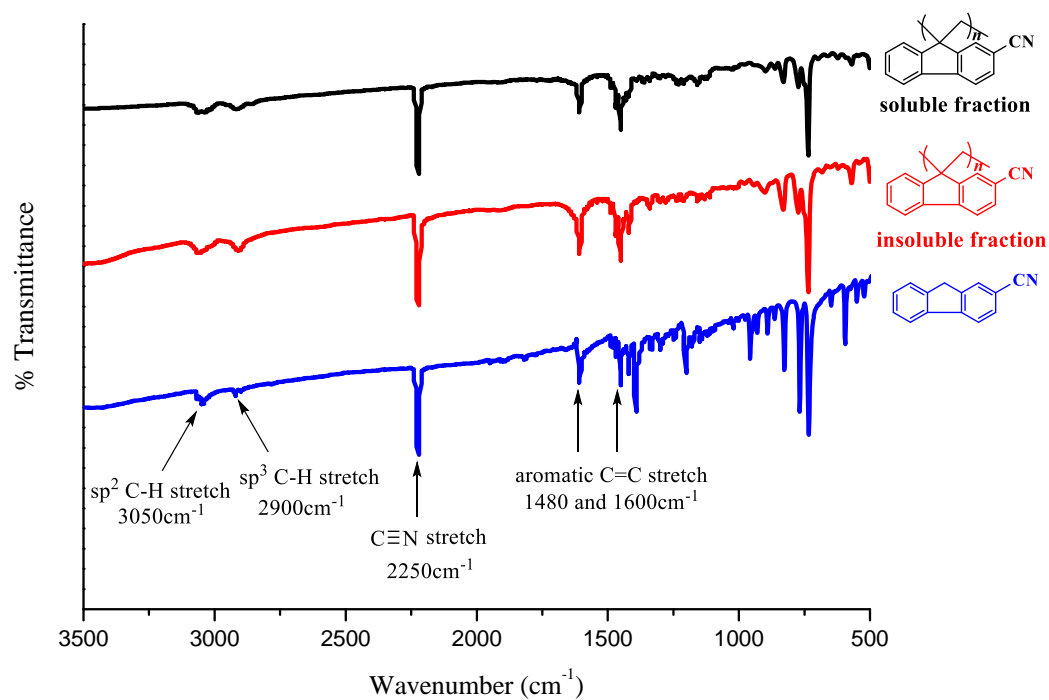

Figure S10. Comparison of IR spectra between **poly(CNDBF)** (both soluble and insoluble fractions) and 2-cyanofluorene with peak assignments. The spectra suggest that both fractions contain same chemical composition.

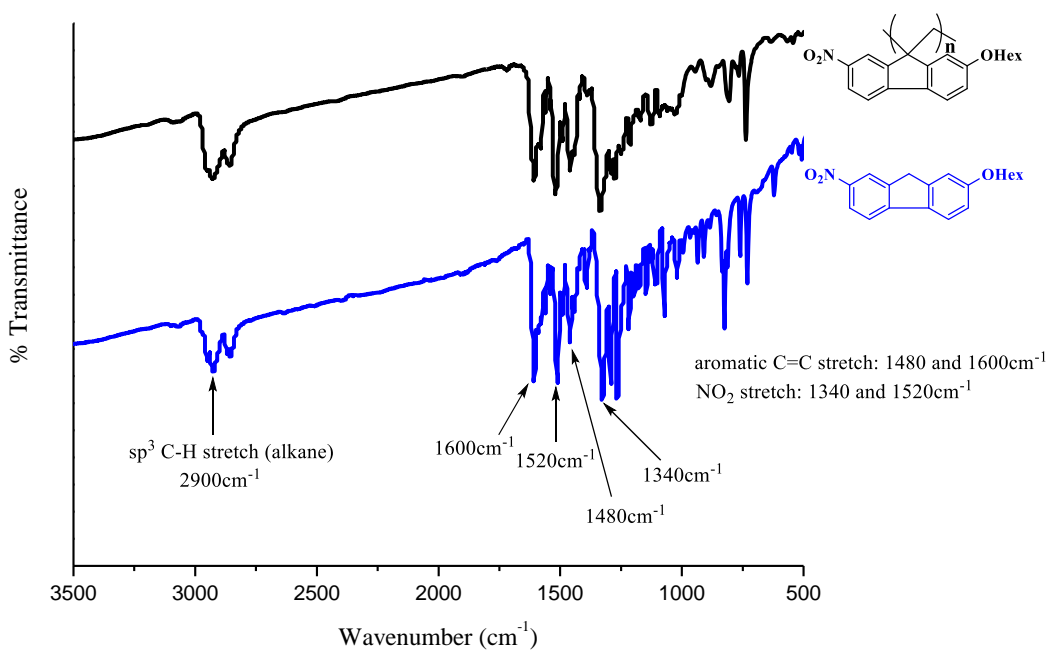

Figure S11. Comparison of IR spectra between **poly(NO<sub>2</sub>HexODBF)** and 2-hexoxy-7-nitrofluorene with peak assignments.

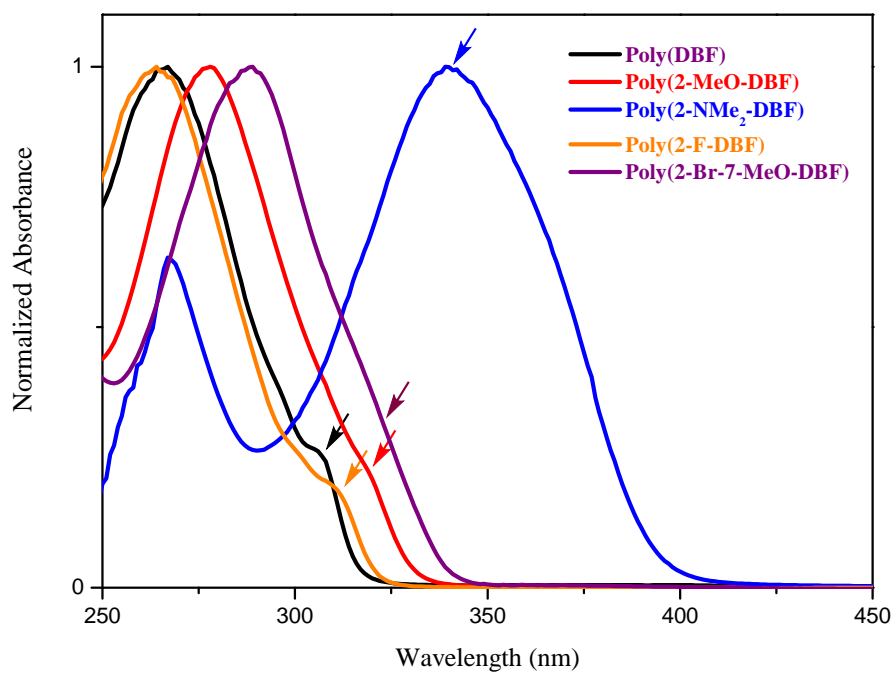

Figure S12. Normalized absorption spectra of some substituted **poly(DBF)**s in THF. Arrows indicate the lowest-energy absorption peak wavelengths.

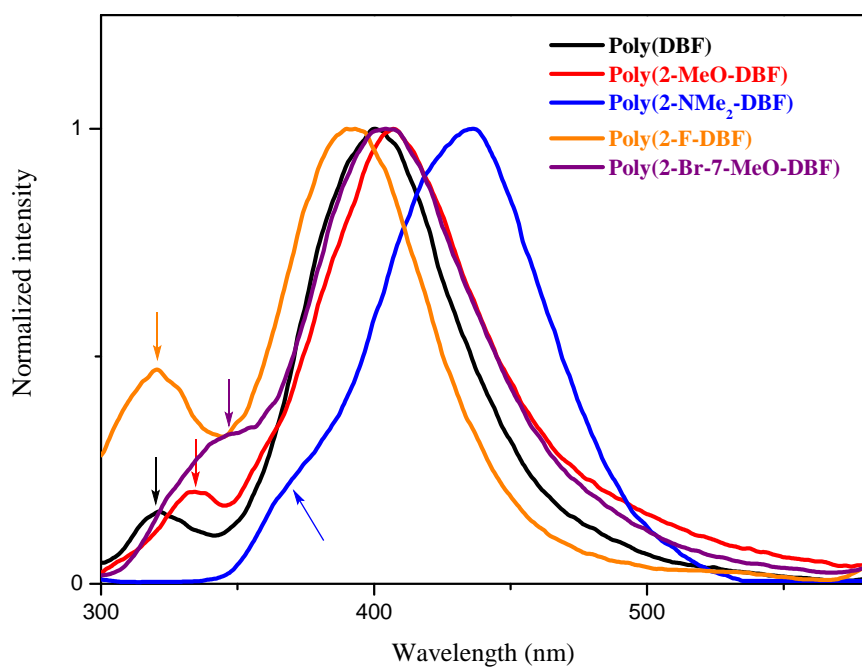

Figure S13. Normalized emission spectra of some substituted **poly(DBF)**s in THF. Arrows indicate the defect emissions.



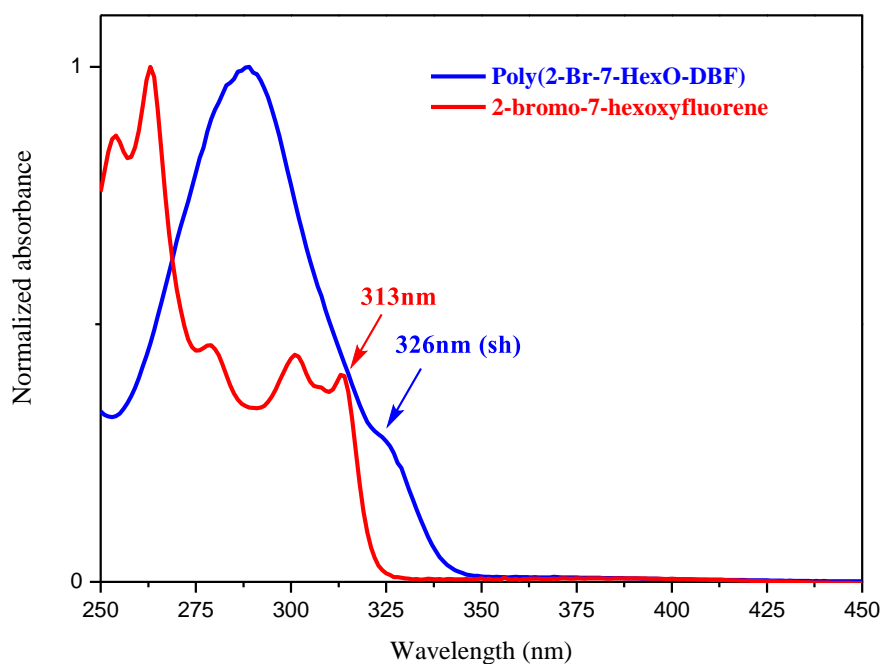

Figure S14. Normalized absorption spectra of **poly(BrHexODBF)** and 2-bromo-7-hexoxyfluorene in THF.

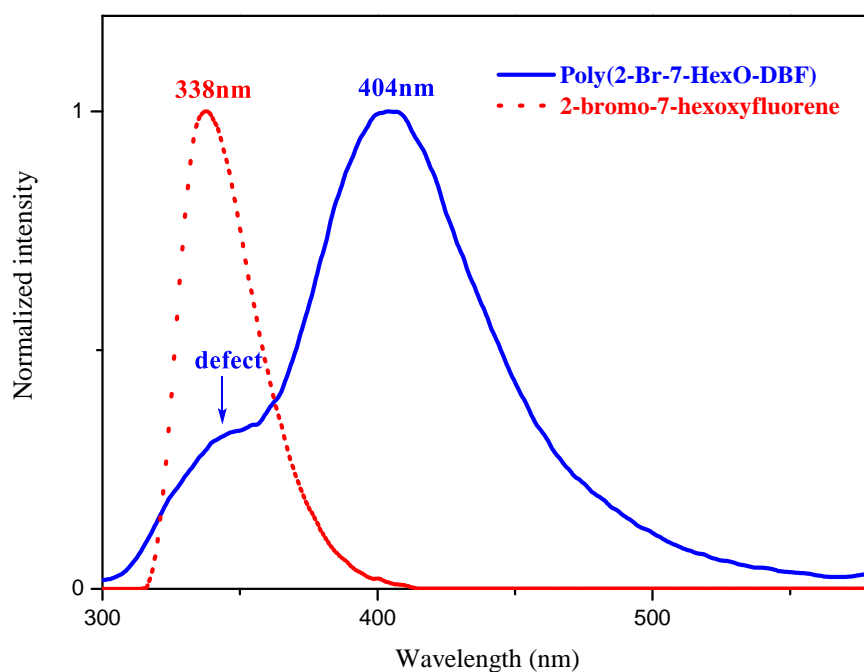

Figure S15. Normalized emission spectra of **poly(BrHexODBF)** and 2-bromo-7-hexoxyfluorene in THF. Arrow indicates the emission of defect in the polymer which matches the emission maximum of 2-bromo-7-hexoxyfluorene.

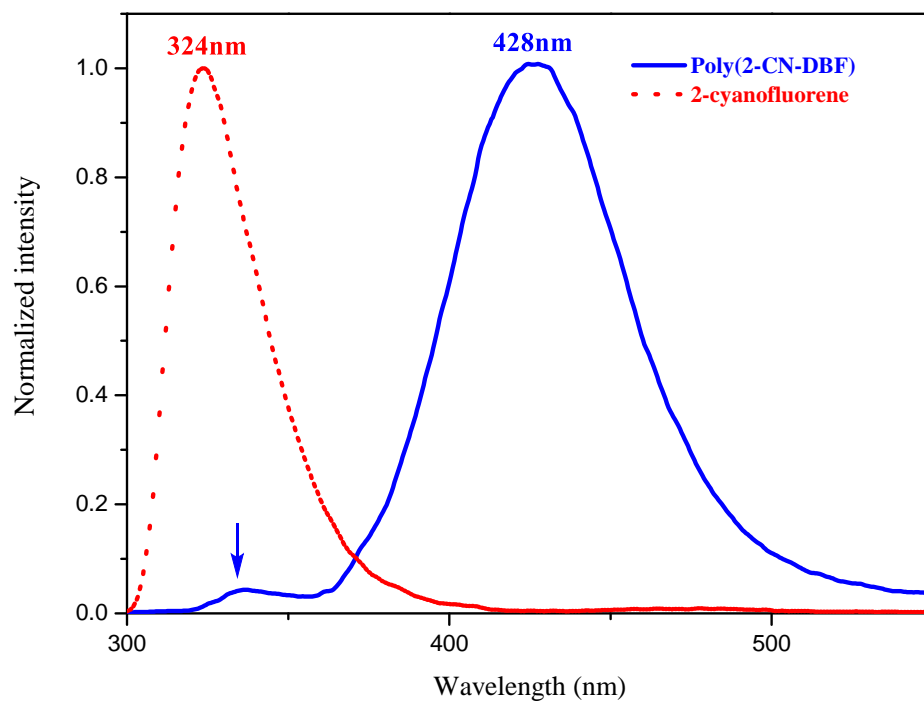

Figure S16. Normalized emission spectra of **poly(CNDBF)** and 2-cyanofluorene in THF. The arrow indicates the emission of the stereochemical defect in the polymer which matches the emission maximum of 2-cyanofluorene. Note the excimer emission strongly outweighs that of the defects despite the low molecular weight of the polymer.

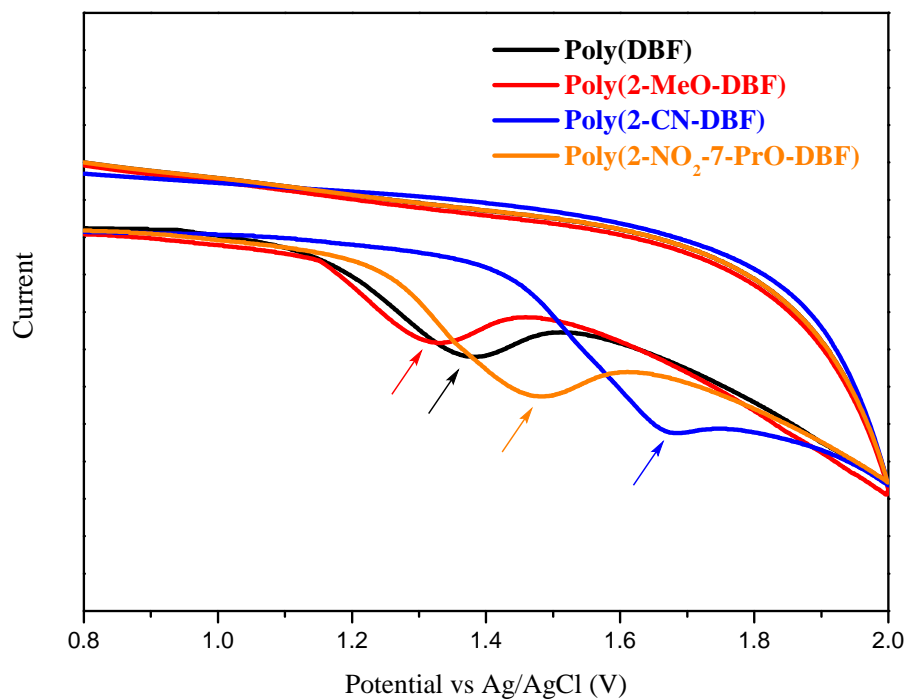

Figure S17. Cyclic voltammograms of some substituted **poly(DBF)s** in THF with 0.1 M *n*-Bu<sub>4</sub>NPF<sub>6</sub> as the supporting electrolyte. Arrows indicate oxidation potentials.

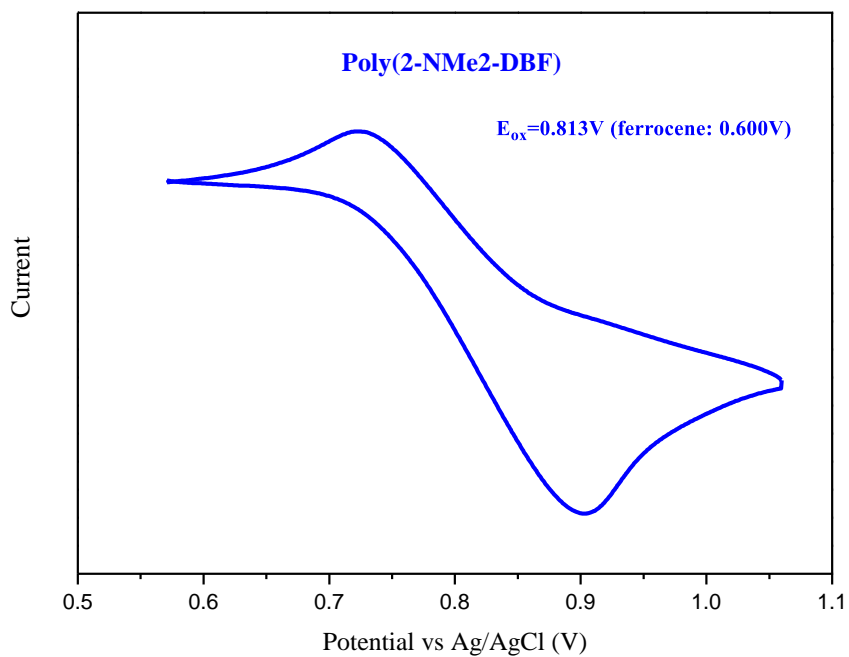

Figure S18. Cyclic voltammograms of **poly(NMe<sub>2</sub>DBF)s** in THF with 0.1 M *n*-Bu<sub>4</sub>NPF<sub>6</sub> as the supporting electrolyte.

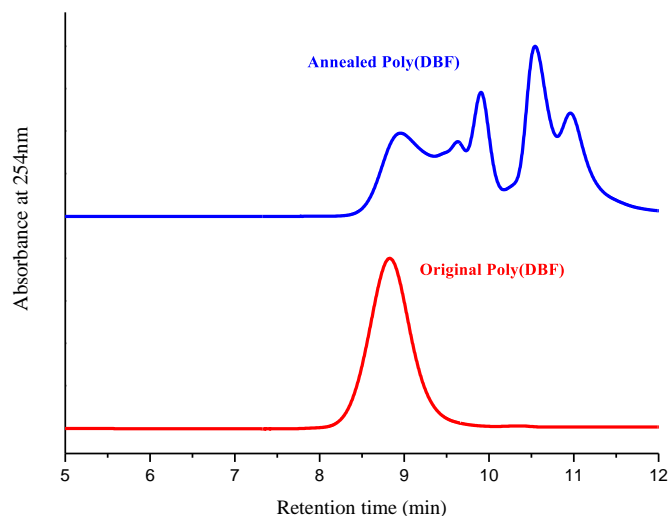

Figure S19. GPC traces of **poly(DBF)** after annealing (top, in blue) and before annealing (bottom, in red).

Table S1. Electrochemical data of the substituted **poly(DBF)s**.<sup>a</sup>

|                         | HOMO <sup>b</sup> (eV) | LUMO <sup>c</sup> (eV) | $\Delta E^d$ (eV) |
|-------------------------|------------------------|------------------------|-------------------|
| <b>Poly(DBF)</b>        | -5.66                  | -1.79                  | 3.87              |
| <b>Poly(MeODBF)</b>     | -5.61                  | -1.96                  | 3.70              |
| <b>Poly(NMe2DBF)</b>    | -5.01                  | -1.90                  | 3.11              |
| <b>Poly(FDBF)</b>       | -5.76                  | -1.91                  | 3.85              |
| <b>Poly(BrDBF)</b>      | -5.86                  | -2.05                  | 3.81              |
| <b>Poly(IDBF)</b>       | -5.83                  | -2.07                  | 3.76              |
| <b>Poly(CNDBF)</b>      | -5.93                  | -2.58                  | 3.35              |
| <b>Poly(NO2DBF)</b>     | -6.07                  | -3.12                  | 2.95              |
| <b>Poly(NO2PrODBF)</b>  | -5.75                  | -3.14                  | 2.61              |
| <b>Poly(NO2HexODBF)</b> | -5.66                  | -3.07                  | 2.59              |
| <b>Poly(BrMeODBF)</b>   | –                      | –                      | –                 |
| <b>Poly(BrPrODBF)</b>   | -5.64                  | -1.97                  | 3.70              |
| <b>Poly(BrHexODBF)</b>  | -5.61                  | -1.89                  | 3.72              |
| <b>Poly(Br2DBF)</b>     | –                      | –                      | –                 |

<sup>a</sup> Performed in degassed THF under N<sub>2</sub> with 0.1 M *n*Bu<sub>4</sub>NPF<sub>6</sub> as the supporting electrolyte. <sup>b</sup> HOMO energies are obtained with reference to ferrocene internal standard by relation: HOMO = – (E<sub>Fc</sub><sup>1/2</sup> + 4.8) eV. <sup>c</sup> LUMO energies are estimated from HOMO and bandgap ( $\Delta E$ ) by relation:  $\Delta E = |\text{HOMO}| - |\text{LUMO}|$ . <sup>d</sup> Bandgap is estimated from the absorption onset wavelength.
